1 ***Plasmodium falciparum* hrp2 and hrp3 gene deletion status in Africa and South America by**  
2 **highly sensitive and specific digital PCR**

3

4 Short title: ***hrp2/hrp3* deletion typing by digital PCR**

5

6 Claudia A. Vera-Arias<sup>1</sup>, Aurel Holzschuh<sup>1,2</sup>, Colins O. Oduma<sup>3,4</sup>, Kingsley Badu<sup>5</sup>, Mutala Abdul-Hakim<sup>5</sup>,

7 Joshua Yukich<sup>6</sup>, Manuel W. Hetzel<sup>2,7</sup>, Bakar S. Fasih<sup>2,7,8</sup>, Abdullah Ali<sup>9</sup>, Marcelo U. Ferreira<sup>10</sup>, Simone

8 Ladeia-Andrade<sup>11</sup>, Fabián E. Sáenz<sup>12</sup>, Yaw Afrane<sup>13</sup>, Endalew Zemene<sup>14</sup>, Delenasaw Yewhalaw<sup>14</sup>, James W.

9 Kazura<sup>15</sup>, Guiyun Yan<sup>16</sup>, Cristian Koepfli<sup>1</sup>

10

11 <sup>1</sup> University of Notre Dame, Notre Dame, IN, United States

12 <sup>2</sup> Swiss Tropical and Public Health Institute, Switzerland

13 <sup>3</sup> Kenya Medical Research Institute-Centre for Global Health Research, Kisumu, Kenya

14 <sup>4</sup> Department of Biochemistry and Molecular Biology, Egerton University, Nakuru, Kenya

15 <sup>5</sup> Kwame Nkrumah University of Science and Technology, Ghana

16 <sup>6</sup> Tulane University, USA

17 <sup>7</sup> University of Basel, Basel, Switzerland

18 <sup>8</sup> Ifakara Health Institute, Dar es Salaam, United Republic of Tanzania

19 <sup>9</sup> Zanzibar Malaria Elimination Programme, Zanzibar, United Republic of Tanzania

20 <sup>10</sup> University of Sao Paulo, Brazil

21 <sup>11</sup> Laboratory of Parasitic Diseases, Fiocruz, Rio de Janeiro, Brazil

22 <sup>12</sup> Centro de Investigación para la Salud en América Latina, Facultad de Ciencias Exactas y Naturales,

23 Pontificia Universidad Católica del Ecuador, Quito, Ecuador

24 <sup>13</sup> Department of Medical Microbiology, University of Ghana Medical School, Accra, Ghana

25 <sup>14</sup> Tropical and Infectious Diseases Research Center, Jimma University, Ethiopia

26 <sup>15</sup> Case Western Reserve University, Cleveland, USA

27 <sup>16</sup> Program in Public Health, University of California, Irvine, CA 92617, USA

28

29 \* Corresponding author: [ckoepfli@nd.edu](mailto:ckoepfli@nd.edu)

30

31

32

33 **Abstract**

34

35 **Background:** The most commonly used *Plasmodium falciparum* rapid diagnostic tests target the Histidine-  
36 Rich Proteins 2 and 3 (HRP2, HRP3). An increasing number of countries report parasites that carry *hrp2*  
37 and/or *hrp3* gene deletions, resulting in false negative test results. Molecular surveillance of *hrp2* and  
38 *hrp3* deletions is crucial but adequate protocols have been lacking.

39 **Methods and Findings:** We have developed novel assays for deletion typing based on droplet digital PCR  
40 (ddPCR), targeting *hrp2* exon1, *hrp2* exon 2, and *hrp3*. In the ddPCR assay, *hrp2* or *hrp3* and a control gene  
41 were quantified with very high accuracy in a single tube. The theoretical limit of detection of the ddPCR  
42 assay was 0.33 parasites/uL, and thus well suited for typing of low-density asymptomatic infections. The  
43 deletion was reliably detected in mixed infections with wild-type and *hrp2*-deleted parasites when the  
44 proportion of parasites carrying the deletion was >40%. For a side-by-side comparison with the  
45 conventional nested PCR (nPCR) assay, 248 samples from asymptomatic individuals from western Kenya  
46 were screened in triplicate by ddPCR and nPCR. No deletions were observed by ddPCR, while by nPCR no  
47 band for *hrp2* was observed in 8% of samples. The ddPCR assay was applied to screen 830 samples from  
48 six countries in Africa and South America. No or very few deletions were observed in Kenya (n=241),  
49 Zanzibar/Tanzania (n=91), and Ghana (n=223). In southwestern Ethiopia, 1/47 (2.1%) samples carried *hrp2*  
50 deletion, and 35/47 (74.5%) *hrp3* deletions. In Brazil, 87/187 (46.5%) samples carried *hrp2* deletions, and  
51 116/187 (62%) *hrp3* deletions. In Ecuador, no *hrp2* deletions were observed, but 22/41 (53.7%) samples  
52 carried *hrp3* deletions.

53 **Conclusions:** Compared to nPCR, the ddPCR assay minimizes the risk of false-negative results (i.e. *hrp2*  
54 deletion observed when the sample is wild type), increases sensitivity, and greatly reduces the number of  
55 reactions that need to be run. Pronounced differences in the prevalence of deletion were observed among  
56 sites, with more *hrp3* than *hrp2* deletions.

57

58

## 59 Introduction

60

61 In 2019, over 200 million cases of malaria and over 400,000 deaths were recorded [1]. *Plasmodium*  
62 *falciparum* remains the primary cause of malaria in humans. Fast and accurate diagnosis and treatment  
63 of clinical episodes are key components of malaria control. Diagnosis is commonly performed either by  
64 light microscopy, or rapid diagnostic tests (RDTs). RDTs are lateral flow devices that detect parasite  
65 proteins in human blood through immunohistochemistry. Light microscopy requires basic lab  
66 infrastructure and skilled microscopists. In contrast, RDTs require minimal infrastructure and training, and  
67 results are available within approximately 15 minutes at a cost of less than 1 USD per test. RDTs are the  
68 only field-deployable diagnostic tool available at peripheral health centers and for community screening  
69 to diagnose asymptomatic infections, for example through reactive case detection [2]. In 2016, over 300  
70 million RDTs were used by malaria control programs [3].

71

72 The most sensitive RDTs for *P. falciparum* rely on the detection of Histidine Rich Protein 2 (HRP2) [4]. HRP2  
73 is a highly expressed secreted protein, and thus an ideal target for diagnosis. It is also the target for a new  
74 generation of ultra-sensitive RDTs with a limit of detection of <100 parasites/ $\mu$ L [5, 6]. While alternative  
75 RDTs detecting other proteins, e.g. parasite lactate dehydrogenase (pLDH), or aldolase, are available, they  
76 are generally less sensitive [7, 8]. HRP2-based RDTs can also detect HRP3, a structurally similar protein  
77 sharing multiple epitopes with HRP2.

78

79 In 2010, a report revealed that a large proportion of *P. falciparum* parasites in Peru did not carry the *hrp2*  
80 gene [9], and thus could not be detected by HRP2-based RDTs. Since then, an increasing number of reports  
81 from Latin America [10-14], Africa [15-22], and Asia [23, 24] found varying proportions of parasites with  
82 *hrp2*-deletion, reaching up to 80% of clinical cases in certain hospitals in Eritrea [18]. In addition, *hrp3* can

83 be deleted. The deletion of either *hrp2* or *hrp3*, or both genes, has no known impact on parasite fitness.  
84 RDTs can yield a positive result if *hrp2* is deleted but *hrp3* is expressed, but sensitivity of the RDT is lower  
85 in this case [25].

86

87 Molecular surveillance to assess the frequency of *hrp2* and *hrp3* deletion is crucial to decide whether  
88 HRP2-based RDTs can be used [26]. The WHO recommends to use alternative diagnostics if the prevalence  
89 of *hrp2* deletion is above 5% [27]. At this level, the number of false-negative tests due to *hrp2* deletion  
90 will exceed the number of false-negative tests because of lower sensitivity of the alternative diagnostics.  
91 The prevalence of *hrp2* deletion has been found to differ substantially within countries [12, 17], thus the  
92 choice of diagnostics might need to be adapted at sub-national level. Where low levels of deletions are  
93 present, HRP2-based RDTs remain a highly useful tool for diagnosis.

94

95 Deletion screening has been classically done using nested PCR (nPCR) followed by gel electrophoresis [26].  
96 Absence of a band is interpreted as deletion. False-negative results could occur when PCR conditions are  
97 suboptimal, or when parasite density is low and amplification is stochastic. To overcome this limitation,  
98 3-fold repetition of the nested *hrp2* PCR and a control PCR (e.g. *msp2*, or *glurp*) is recommended [26]. As  
99 a result, for each sample twelve PCRs need to be run. Deletion status might remain unresolved if results  
100 differ among replicates. As an additional problem, multiple clone *P. falciparum* infections are common in  
101 most endemic settings [28]. In case of a multiple clone infection with a wild-type parasite and a parasite  
102 carrying the deletion, the wild type parasite will result in a band on the gel when using the nPCR assay.  
103 Multiple clone infections can thus mask the presence of deletions, resulting in an underestimation of the  
104 frequency of deletion [29]. More recently, quantitative PCR (qPCR) protocols for *hrp2/hrp3* deletion typing  
105 were published [30], greatly enhancing throughput. However, when parasite densities are low,

106 considerable variation in quantification is observed between replicates [31]. As a result of the technical  
107 challenges for accurate typing, maps of *hrp2* deletion frequency remain scattered and incomplete.

108

109 We have developed a novel method for typing of *hrp2* and *hrp3* deletions based on droplet digital PCR  
110 (ddPCR). ddPCR yields highly accurate quantification of parasites [31]. In a ddPCR experiment, the reaction  
111 volume is partitioned into approximately 15,000 microdroplets, which are then subject to end-point PCR.  
112 Each droplet functions as an individual PCR reaction, with amplification occurring if the droplet contains  
113 template DNA. The number of positive droplets corresponds to the number of template DNA copies. Using  
114 two different probes, two targets can be quantified in a single reaction well, e.g. a control gene and a  
115 target gene. As each droplet with template can be considered a 'within-well replicate', a single well offers  
116 the sensitivity and specificity of a large number of replicates by nPCR or qPCR. The risk of false negative  
117 results (i.e. no amplification when template is present) is thus minimal compared to nPCR or qPCR. The  
118 novel assay greatly reduces the number of reactions to be run, increase sensitivity and accuracy, and can  
119 detect the deletion in mixed infections. The assay was extensively validated using culture strains, and field  
120 isolates from Kenya, Zanzibar/Tanzania, Ethiopia, Ghana, Brazil, and Ecuador.

121

122

123

124

125 **Methods**

126

127 **Ethics statement**

128 Informed written consent was obtained from all study participants or their parents or legal guardians prior  
129 to sample collection. The study was approved by the University of Notre Dame Institutional Review Board  
130 (approvals 18-08-4803, 19-04-5321, 18-12-5029), the Institutional Scientific and Ethical Review boards of  
131 the Noguchi Memorial Institute of Medical Research, University of Ghana, the Committee on Human  
132 Research, Publication and Ethics, School of Medical Science, Kwame Nkrumah University of Science and  
133 Technology, Kumasi (CHRPE/AP/375/20), the Zanzibar Medical Research Ethics Committee  
134 (ZAMREC/0001/Feb/17), the Institutional Review Board of Tulane University (17-993573), the Institutional  
135 Review Board of the Ifakara Health Institute (003-2017), the Ethics Commission of North-western and  
136 Central Switzerland (Req-2017-00162), the Institutional Review Board of Institute of Health, Jimma  
137 University, Ethiopia (RPGC/486/06), Maseno University Ethics Review Committee (MUERC protocol  
138 number 00456), the Ethics Committee for Research in Human Beings of the Pontificia Universidad Católica  
139 del Ecuador (CEISH-571-2018), the Ministry of Public Health of Ecuador (MSP-DIS-2019-004-O), and the  
140 institutional review board of Oswaldo Cruz Foundation, Brazil (no. 022/2009).

141

142 **Digital PCR assays**

143 Four novel ddPCR assays were developed. One assay targets the conserved first 120 bp of *hrp2* exon 2,  
144 and thus is located directly adjacent to the histidine-rich repeats. Different breakpoint for the *hrp2*  
145 deletion have been described [26]. The novel primers for exon 2 are located in a region that is deleted in  
146 all known deletion variants, thus irrespective of the specific breakpoint, *hrp2* deletion will be detected.  
147 The second assay targets *hrp2* exon 1. While exon 1 does not contain antigens that are recognized by  
148 RDTs, the deletion of this exon 1 would prevent proper expression of the protein. The third assay targets



149 *hrp3*. Each assay was multiplexed with an assay targeting *serine-tRNA ligase* (PF3D7\_0717700, herein  
150 referred to as '*tRNA*'). *tRNA* is a conserved, essential single copy gene, that is frequently used as reference  
151 for gene expression assays [32]. In wild type infections not carrying a deletion, the copy numbers of *tRNA*  
152 and *hrp2* or *hrp3* are identical.

153  
154 Novel primers and probes were developed for all assays (Table 1). Assay conditions are given in  
155 Supplementary File S1. Across over >3000 genomes available through MalariaGen and PlasmoDB, no SNPs  
156 were recorded in primer and probe sequences, thus the assay can be used for the screening of isolates of  
157 global origin. Assay conditions were optimized to achieve maximal separation between positive and  
158 negative droplets (Figure 1, Supplementary File S2, Figure S1).

159  
160 **Table 1:** Primer and probe sequences

161

| Assay                      | Sequence 5'-3'                        |
|----------------------------|---------------------------------------|
| <i>hrp2</i> exon 2 forward | CATTTTAAATGCTTTTTATTTTATATAG          |
| <i>hrp2</i> exon 2 reverse | CTTGAGTTTCGTGTAATAATCTC               |
| <i>hrp2</i> exon 2 probe   | FAM-CGCATTTAATAATAACTTGTGTAGCAAAAATGC |
| <i>hrp2</i> exon 1 forward | ATATTATACATTTTGTATTATTTCTTTTC         |
| <i>hrp2</i> exon 1 reverse | CGTTATCTAACAAAAGTACGGAG               |
| <i>hrp2</i> exon 1 probe   | FAM-CAAAAACGGCAGCGGATAAATACTT         |
| <i>hrp3</i> forward        | ATGCTAATCACGGATTTCAATTTA              |
| <i>hrp3</i> reverse        | ATCGTCATGGTGAGAATCATC                 |
| <i>hrp3</i> probe          | FAM-CCTTCACGATAACAATTCCCATACTTTAC     |
| <i>tRNA</i> forward        | CATCAAATGAAGATTTAACAAGAG              |
| <i>tRNA</i> reverse        | CTTTTGATTCTATAGTTTCATCTTTATG          |
| <i>tRNA</i> probe          | HEX-CTACCTCAGAACAACCATTATGTGCT        |

162

### 163 **3D7 and Dd2 parasite culture strain mixtures**

164 In order to determine the ability to detect mixed clone infections with only one strain carrying the  
165 deletion, experimental mixtures were made from two well-characterized laboratory strains, 3D7 (no  
166 deletions), and Dd2 (carrying the *hrp2* deletion). Each strain was cultured separately, DNA extracted, and  
167 quantified by ddPCR using the *hrp2/tRNA* ligase assay. No *hrp2* was detected in Dd2. Mixtures were  
168 prepared with a concentration (of both strains combined) of 10, 50, 100, and 500 genomes/ $\mu$ L, and with  
169 a 3D7 to Dd2 ratio of 100:0, 80:20, 60:40, 40:60, 20:80, and 0:100. Each mixture was run in triplicate using  
170 the *hrp2* exon2/ *tRNA* ligase assay. The ratio of *hrp2* to *tRNA* copy numbers was compared to expected  
171 values.

172

### 173 **Nested PCR assay for *hrp2***

174 In order to compare the ddPCR assay directly to the established nPCR assay, 248 samples from  
175 asymptomatic carriers in western Kenya were run by the *hrp2* exon 2 assay, and the *hrp2* nsPCR in  
176 triplicate. Assay conditions for the nPCR followed published protocols [33, 34] and are given in  
177 Supplementary File S1.

178

### 179 **Field isolates**

180 Field isolates were screened from Kenya, Zanzibar in the United Republic of Tanzania, Ethiopia, Ghana,  
181 Brazil, and Ecuador. Samples from Kenya (n=248) were from Chulaimbo and Homa Bay in western Kenya  
182 close to Lake Victoria. Samples were collected in a cross-sectional survey including individuals of all ages  
183 from January-August 2019. Finger-prick samples were collected in EDTA microtainers and infections  
184 detected by qPCR. Overall *P. falciparum* prevalence across both sites was 16% [35]. No diagnosis by RDT  
185 or microscopy was done.

186

187 Samples from Zanzibar (n=91) had been collected in the frame of a study on reactive case detection (RCD)  
188 from May 2017 to October 2018 [2]. Asymptomatic infections identified through RCD were typed. During  
189 RCD, infections were diagnosed by HRP2/pLDH-based RDT (SD BIOLINE Malaria Ag Pf HRP2/pLHD), a blood  
190 spot was collected on filter paper, and infections diagnosed by qPCR [2]. Prevalence (not including index  
191 cases) was 0.8% by RDT and 2.4% by qPCR. All samples with a density (by qPCR) of >100 parasites/ $\mu$ L were  
192 selected for *hrp2/hrp3* deletion typing, irrespective of RDT result.

193

194 Samples from Ethiopia (n=47) included clinical cases and asymptomatic individuals sampled in June to  
195 November 2016 from Jimma Zone, Oromia Region. *P. falciparum* prevalence was 4% by microscopy and  
196 8.3% by qPCR [36]. No RDT screening was conducted.

197

198 From Ghana, 2 sets of samples were typed. The first set (n=11) was collected in June-September of 2017  
199 from febrile school children aged 5-14 years [37]. The second set (n=212) was collected in Mankranso and  
200 Agona Hospitals in the Ashanti region from febrile patients from September to December 2020.

201

202 In Brazil, samples (n=187) were collected in Cruzeiro do Sul, Upper Juruá Valley, northwestern Brazil, in  
203 2010-2013. This is the country's main malaria hotspot, which accounted for nearly 15% of all *P. falciparum*  
204 infections in Brazil at the time of the study. Samples were collected from clinical patients 4 to 73 years of  
205 age (mean, 26.6) enrolled for a drug efficacy trial [38]. Only baseline samples from patients with  
206 microscopy- and PCR-confirmed *P. falciparum* infection were included in this study. Even though these  
207 samples had been collected nearly a decade ago and might not reflect the current status of *hrp2/hrp3*  
208 deletion, they were included in light of the known high levels of *hrp2/hrp3* deletion in Latin America to

209 confirm the ability of the assays to reliably detect deletions in field isolates [39]. Because of little template  
210 volume available, Brazilian samples were not screened for *hrp2* exon 1 deletion.

211

212 In Ecuador, samples (n=41) were collected from clinical patients from March 2019 to April 2020. The  
213 samples were collected in Esmeraldas and Carchi Provinces in the north-west of the country, where most  
214 *P. falciparum* cases of Ecuador are reported. All infections were confirmed by microscopy and collected  
215 as blood spots in filter paper. Three samples were collected from travelers coming from the Pacific coast  
216 in Colombia but diagnosed in Ecuador.

217

#### 218 **Data analysis**

219

220 For the analysis of the ddPCR data, the following criteria were applied: A minimum of 2 droplets positive  
221 for *tRNA* were required to include a sample in data analysis. Samples were repeated if a deletion was  
222 observed but  $\leq 5$  droplets were positive for *tRNA*. At a density of  $>5$  droplets positive for *tRNA*, the  
223 probability of a false-negative result for *hrp2* or *hrp3* (i.e. no positive droplet in a wild-type infection) is  
224 less than 1:500. Data for all samples and assays are provided in Supplementary File S3.

225

226 **Results**

227

228 **Assay development and validation**

229

230 New primers and probes were developed for *hrp2* exon 1, *hrp2* exon 2, *hrp3*, and *tRNA* (Table 1). Upon  
231 optimization of assay conditions, clear separation between negative and positive droplets was obtained  
232 across a wide range of parasite densities (Figure 1, Supplementary Figure S1). No positive droplets for  
233 *hrp2* or *hrp3* were observed in case of deletion, while the separation between negative droplets and those  
234 positive for *tRNA* remained clear (Figure 1, Supplementary Figure S1).

235

**A: Wild-type, medium density**

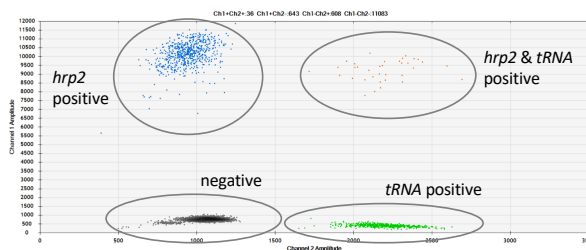

**B: Wild-type, low density**

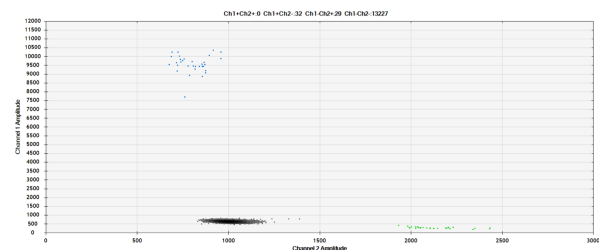

**C: *hrp2* deletion**

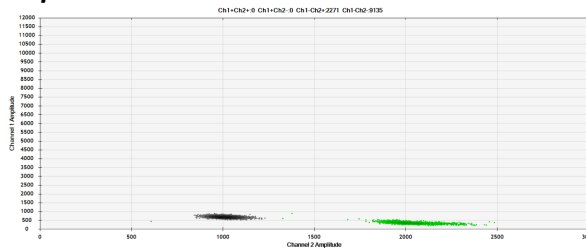

**D: Mixed infection**

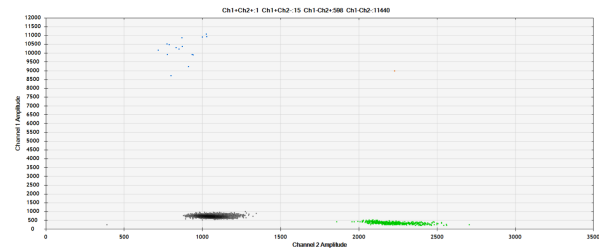

236

237

238 **Figure 1:** Examples of *hrp2* exon 2 deletion typing by ddPCR. Droplets positive for *hrp2* are shown in blue (top left of each panel).  
239 Droplets positive for *tRNA* are shown in green (bottom right). Droplets positive for *hrp2* and *tRNA* are shown in orange (top right).  
240 Negative droplets (for both *hrp2* and *tRNA*) are shown in gray (bottom left). A) Wild-type infection of medium density.  
241 Approximately 600 droplets are positive each for *hrp2* and *tRNA*, and 36 for both targets. B) Wild-type sample of low-density: 32  
242 and 29 droplets are positive for *hrp2* and *tRNA*, respectively. C) *hrp2* deletion: Droplets are positive for *tRNA*, but no droplets are

243 positive for *hrp2*. D) Mixed infection with wild-type parasites and parasites carrying *hrp2* deletion. Only 15 droplets are positive  
244 for *hrp2*, but 598 droplets are positive for *tRNA*.

245

246 To evaluate reproducibility and the limit of reliable detection, 248 isolates from asymptomatic carriers in  
247 Kenya were typed for the *hrp2* exon 2 assay in triplicate. Geometric mean density was 95 genomes/ $\mu$ L,

248 and 47/248 samples were at densities <10 genomes/ $\mu$ L. By ddPCR, 235/248 (94.6%) of samples met

249 inclusion criteria of  $\geq 2$  droplets positive for *tRNA* in all 3 replicates. Highly similar quantification among

250 replicates was observed (Figure 2A). For each sample, the highest and lowest value of *hrp2* copies/ $\mu$ L was

251 recorded. Correlation among technical replicates was very high ( $R^2=0.990$ ). Likewise, for each sample, the

252 highest and lowest value of *tRNA* copies were recorded, and correlation was very high ( $R^2=0.991$ ).

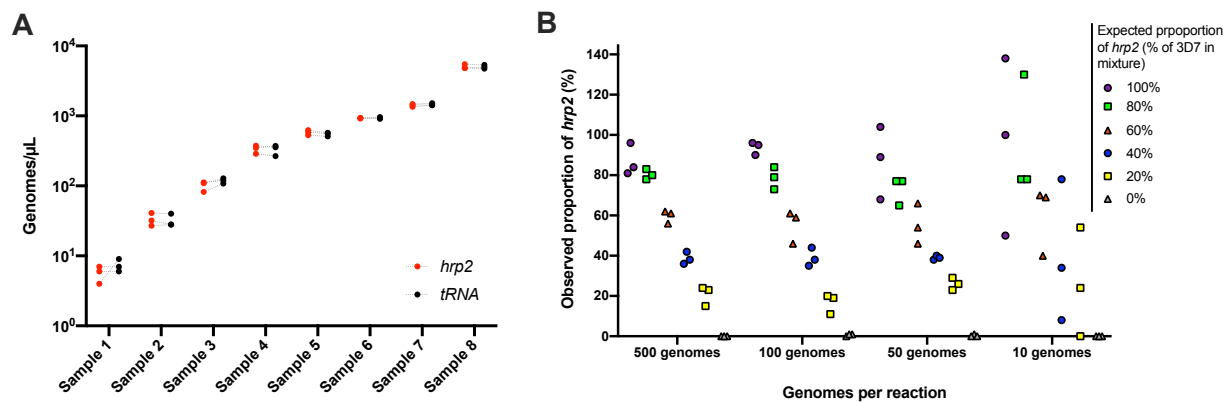

253

254

255 **Figure 2:** Validation of assay. A) Samples typed in triplicate for the *hrp2* exon 2/*tRNA* assay. Representative examples of different

256 parasite densities are shown. For each sample, the quantification of *hrp2* exon 2, and of *tRNA* is shown. Results from the same

257 run are connected by a dashed line. B) Mixtures of 3D7 (wild type) and Dd2 (*hrp2* deletion). Mixtures were run in triplicate at

258 densities of 10-500 genomes/reaction, and at ratios of 0-100% Dd2. The expected proportion of *hrp2* to *tRNA* copies corresponds

259 to the proportion of 3D7 in the mixture. The observed proportion reflects the expected proportion closely for all mixtures at 500

260 and 100 genome/reaction.

261

262 No deletions were detected in the 248 samples from western Kenya. I.e., no samples with droplets for  
263 *tRNA* but no droplets for *hrp2* were observed, even though density was low in many samples. In the  
264 ddPCR, approximately two-thirds of the reaction volume was transformed into droplets. Applying the  
265 threshold of 2 droplets positive for *tRNA*, three template genomes were required per reaction well to  
266 reach that threshold. Up to 9  $\mu\text{L}$  of template DNA could be added to one reaction when primers and  
267 probes are kept at 100  $\mu\text{M}$ . Thus, the theoretical limit of detection was 0.33 parasites/ $\mu\text{L}$ . If  $\leq 5$  droplets  
268 are positive for *tRNA* and a deletion is observed, it is recommended to repeat the sample.

269

270

#### 271 **Detection of mixed infections with *hrp2*-negative and wild type parasites**

272

273 To test the ability of the assay to detect deletions when only part of all parasites in an isolate carry the  
274 deletion, experimental mixtures were prepared with DNA from parasite culture of 3D7 (wild-type), and  
275 Dd2 (*hrp2* deletion). Mixtures were prepared at ratios from 0% to 100% Dd2, and at densities of 10-500  
276 genomes/reaction. At densities of 100 to 500 genomes/ $\mu\text{L}$ , the quantification by ddPCR represented the  
277 mixture ratio with high accuracy (Figure 2B). Whenever 40% or more of parasites carried the deletion, the  
278 observed ratio was clearly below 100%. In cases where only a small proportion of all parasites carried the  
279 deletion (20% Dd2 vs. 80% 3D7), the difference in quantification of *hrp2* and *tRNA* was too small to  
280 observe the deletion. Likewise, at densities  $< 50$  genomes/reaction the ratio did not accurately reflect the  
281 experimental mixture.

282

283 The results were corroborated by screening of 739 field samples from five countries. In wild type isolates,  
284 a very similar quantification of *hrp2* and *tRNA* was expected. Unless samples carried a clear deletion (i.e.

285 no or very little *hrp2* signal), in all samples with densities of >50 copies/ $\mu$ L, the ratio of *hrp2* to *tRNA* copies  
286 was above 0.6 (Figure 3). With increasing parasite density, the ratio got closer to 1.  
287

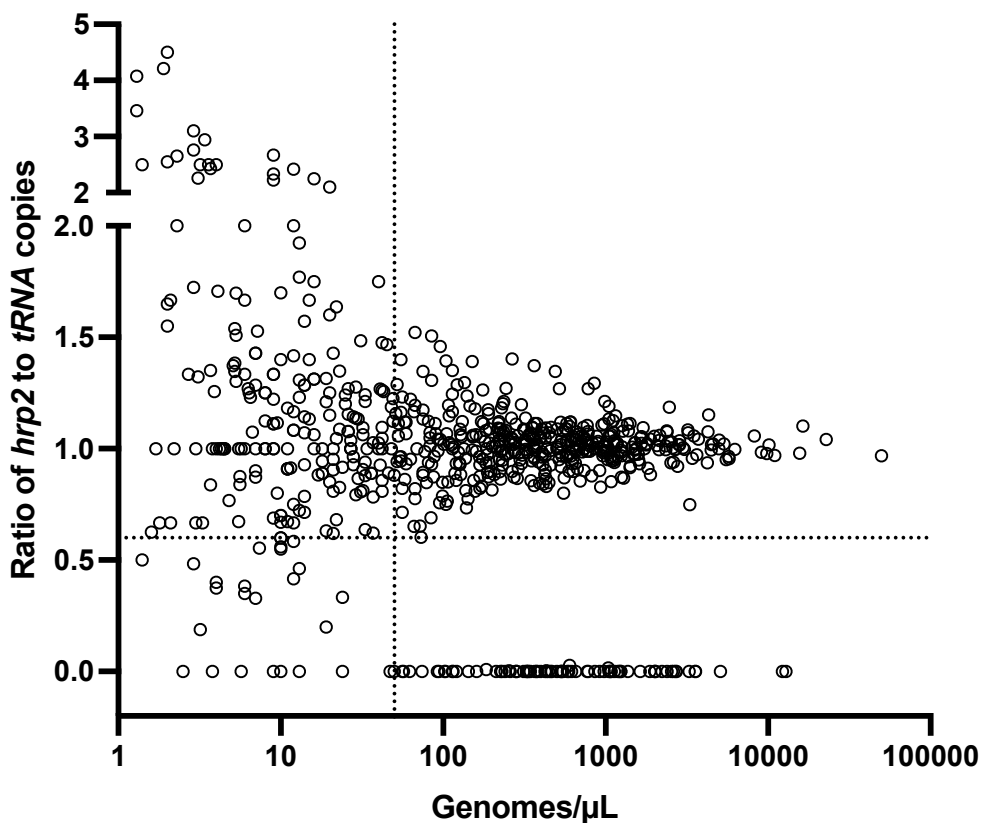

288  
289 **Figure 3:** Ratios of *hrp2* to *tRNA* copies in 684 field isolates. With increasing parasite density (X-axis), the ratio becomes close to  
290 1. Deletions (with no wild type parasites present) have a ratio of 0. Dashed lines show a ratio of *hrp2* to *tRNA* copies of 0.6, and  
291 50 genomes/ $\mu$ L. Mixed infection can be reliably detected at densities >50 genomes/ $\mu$ L, and if >40% of parasites carry the deletion.  
292  
293 A lower ratio of *hrp2* to *tRNA* copies was observed in samples from Zanzibar, where the mean ratio of  
294 *hrp2*/*tRNA* copies was 0.82 in absence of any samples that carried *hrp2* deletion (Supplementary Figure  
295 S2). The reason is not known, but might be caused by sampling and storage procedures. Blood samples  
296 from Zanzibar were collected on filter paper, and stored at ambient temperature for over three years



297 prior to extraction. Possibly, this could have resulted in DNA degradation, that affected *hrp2* more than  
298 *tRNA*.

299

300

### 301 **Comparison of ddPCR to gel-based nested PCR**

302

303 The *hrp2* exon 2 ddPCR assay was compared to the classical nPCR assay with visualization of products on  
304 agarose gel in 248 asymptomatic infections from western Kenya. The density of asymptomatic infections  
305 is often low and thus amplification by PCR can be stochastic. All assays were run in triplicate, i.e. *hrp2*-  
306 exon2/*tRNA* by ddPCR, *hrp2* nested PCR, and *msp2* nested PCR.

307

308 Samples were included in analysis if the PCR for the control gene was positive in all three replicates, i.e. if  
309 >2 droplets were positive for *tRNA* in the ddPCR assay, or a band was detected for *msp2* in all three  
310 replicates. For the gel-based assay, 85.5% (212/248) samples met inclusion criteria (Table 2). Among those  
311 positive, for 144/212 samples a band for *hrp2* was observed in all three replicates. A band in two replicates  
312 was observed for 34 samples, and a band in a single replicate for 17 samples. For 17 samples, despite  
313 obtaining a band for *msp2* in all three replicates, no band for *hrp2* was observed. These 17 samples would  
314 thus be classified as *hrp2* deletion, resulting in a prevalence of deletion of 8.0% (17/212). Figure 3 shows  
315 representative examples of results of the nPCR and ddPCR assays.

316

317 **Table 2:** Comparison between nested PCR and ddPCR-based *hrp2* deletion typing

318

|               | nested PCR | ddPCR |
|---------------|------------|-------|
| Total samples | 248        | 248   |

|                            |               |             |
|----------------------------|---------------|-------------|
| Met inclusion criteria     | 212 (85.5%)   | 235 (94.8%) |
| Deletion in 3/3 replicates | 17            | 0           |
| Deletion in 2/3 replicates | 17            | 0           |
| Deletion in 1/3 replicates | 34            | 2           |
| No deletion                | 144           | 233         |
| Prevalence of deletion     | 8.0% (17/212) | 0% (0/235)  |

319

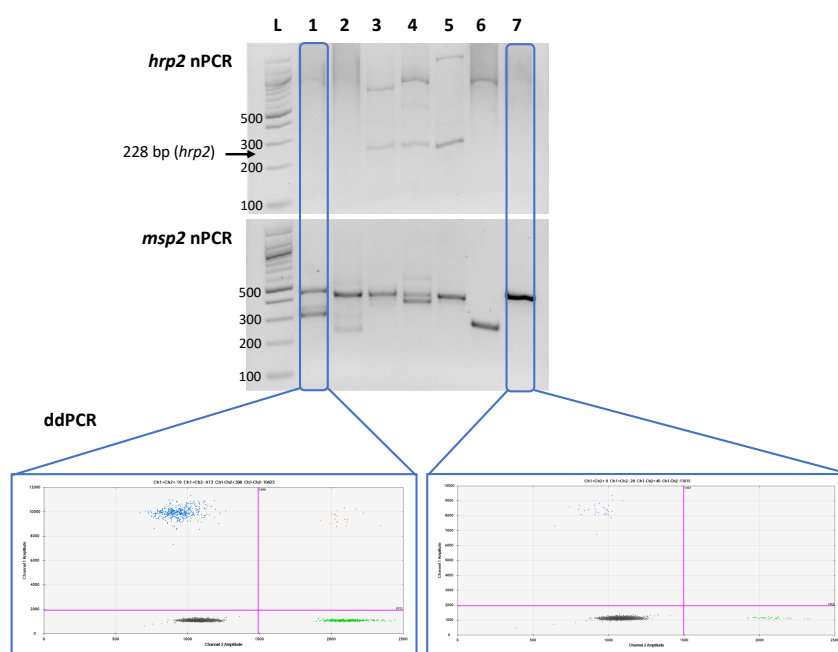

320

321 **Figure 3:** Comparison of nPCR and ddPCR for *hrp2* deletion typing. Representative examples of results obtained by *hrp2* and *msp2*  
322 nPCR, and by ddPCR. The expected size of the *hrp2* band is 228 bp. A band is visible in samples 3, 4, and 5, but no band is visible  
323 in samples 1, 2, 6, and 7. *msp2* was run as control for the nPCR assay. *msp2* is a size polymorphic gene with amplicons ranging  
324 from approximately 200 to 500 bp. Bands are observed for all samples, and multiple bands are observed in case of polyclonal  
325 infections. L = 100 bp DNA ladder (New England BioLabs). Samples were run in triplicate, and the same results was obtained all  
326 three times. By ddPCR, no deletions were observed in any samples. For samples 1 and 7, the *hrp2* exon 2/*tRNA* ddPCR plot is  
327 shown. Droplets are visible for both targets, thus no deletion is observed.

328

329

330 By ddPCR, the criteria for inclusion ( $\geq 2$  droplets for *tRNA*) was met by 94.8% (235/248) of samples. Among  
 331 them,  $\geq 2$  droplets for *hrp2* were detected in all three replicates in 233/235 samples. In 2 samples in only  
 332 two of the three replicates  $\geq 2$  droplets were positive for *hrp2*. Both of these samples had one replicate  
 333 with 1 positive droplet for *hrp2*, and 5 positive droplets for *tRNA*. In none of the samples all three or two  
 334 out of three replicates were negative for *hrp2*. Thus, the prevalence of deletion by ddPCR was 0%.

335

336 ***hrp2* and *hrp3* deletions in Africa and South America**

337

338 The new ddPCR assay was applied to screen for deletions in 830 samples from Kenya, Zanzibar, Ethiopia,  
 339 Ghana, Brazil, and Ecuador. The frequency of deletions for all loci and sites is given in Table 3.

340

341 **Table 3:** *hrp2* and *hrp3* deletions in Africa and South America

| Site     | N   | Deletions          |                    |                 |                               |                                   |
|----------|-----|--------------------|--------------------|-----------------|-------------------------------|-----------------------------------|
|          |     | <i>hrp2</i> exon 2 | <i>hrp2</i> exon 1 | <i>hrp3</i>     | <i>hrp2+hrp3</i> <sup>1</sup> | Mixed <sup>2</sup>                |
| Kenya    | 241 | 0% (0/241)         | 0% (0/241)         | 0% (0/241)      | 0% (0/241)                    |                                   |
| Zanzibar | 91  | 0% (0/91)          | 0% (0/91)          | 0% (0/91)       | 0% (0/91)                     |                                   |
| Ethiopia | 47  | 2.1% (1/47)        | 2.1% (1/47)        | 74.5% (35/47)   | 2.1% (1/47)                   | 1 x <i>hrp3</i>                   |
| Ghana    | 223 | 0% (0/226)         | 0% (0/223)         | 0.4% (1/223)    | 0% (0/170)                    | 1 x <i>hrp2</i> , 3 x <i>hrp3</i> |
| Brazil   | 187 | 46.5% (87/187)     | NA                 | 62.0% (116/187) | 46.0% (86/187)                | 2 x <i>hrp2</i> , 2 x <i>hrp3</i> |
| Ecuador  | 41  | 0% (0/41)          | 0% (0/41)          | 53.7% (22/41)   | 0% (0/39)                     |                                   |

342

343 <sup>1</sup> Isolates with deletions of *hrp2* and *hrp3*. Note that these isolates are also counted as deletions in the columns for *hrp2*, and for  
 344 *hrp3* (e.g. in Brazil 87 isolates carried *hrp2* deletion, of which 86 also carried *hrp3* deletion).

345 <sup>2</sup> Isolates with only a proportion of all parasites carrying the deletion.

346

347 From Kenya, 241 samples were typed and no deletions of *hrp2* or *hrp3* were observed. In Zanzibar, no  
348 deletions were observed among 91 samples. Among 223 samples from Ghana, 1 *hrp2* deletion/wild type  
349 mixed sample was detected (ratio of *hrp2* to *tRNA* copies was <0.6, and parasite density >50 genomes/ $\mu$ L),  
350 1 *hrp3* deletion, and 3 samples with *hrp3* deletion/wild type mixes.

351

352 In Ethiopia, 47 samples met inclusion criteria. One sample carried a deletion of *hrp2* exons 1 and 2,  
353 resulting in a frequency of deletion of 2.1%. *hrp3* deletion was observed in 35/47 (74.5%) samples, and  
354 one sample carried a mixed infection with wild type/*hrp3* deletion. The sample with *hrp2* deletion was  
355 among the samples with *hrp3* deletion, i.e. both genes were deleted.

356

357 From Brazil, 187 samples were screened. 87 samples carried a deletion of *hrp2*. Two additional samples  
358 carried mixed infections with wild type parasites and *hrp2* deletion. Deletion of *hrp3* was observed in  
359 116/187 (62.0%) samples, and 86/187 (46.0%) samples carried deletions of *hrp2* and *hrp3*. No *hrp2*  
360 deletions were observed in Ecuador, but 22/41 (53.7%) samples carried *hrp3* deletions.

361

362

## 363 Discussion

364

365 Molecular surveillance of the extent of *hrp2* and *hrp3* deletions is a high priority task to select the optimal  
366 tools for *P. falciparum* diagnosis. The novel assay based on ddPCR yielded highly accurate results, and was  
367 able to detect mixed infections with wild-type parasites and parasites carrying *hrp2* deletion. The good  
368 performance of the assay was shown by typing of samples from six countries. The samples reflected a  
369 range of parasite densities, from low-density asymptomatic infections to high-density clinical infections,  
370 and sites represented a range in the frequency of *hrp2* and/or *hrp3* deletions. Across over 800 field  
371 samples screened, <10 samples needed to be repeated because of poor separation between negative and  
372 positive droplets, or failure of droplet generation.

373

374 High sensitivity is required for accurate typing of low-density infections. We validated a threshold of two  
375 droplets positive for *tRNA* as limit of detection. When 9  $\mu$ L of DNA are used as template, this results in a  
376 theoretical limit of detection of 0.33 parasites/ $\mu$ L. Sensitivity can be further increased by concentrating  
377 the DNA prior to typing.

378

379 The ddPCR assay showed increased sensitivity and specificity to type low-density infections compared to  
380 nPCR. Out of 248 asymptomatic samples from western Kenya, 95% could be analyzed by ddPCR, but only  
381 85% by nPCR. More importantly, results on deletion status differed substantially. By ddPCR, no deletions  
382 were observed. By nPCR, no band was observed for *hrp2* in 8% of samples that had a positive band for the  
383 control gene (*mSP2*) in all three replicates. Thus, the frequency of deletion was above the 5% threshold,  
384 and it would be erroneously recommended to discontinue the use of HRP2-based RDTs. The frequency of  
385 deletion by nPCR was similar to a previous study conducted in a nearby site in western Kenya that found  
386 *hrp2* deletion in 8/89 samples using nPCR [40]. The direct comparison of ddPCR and nPCR in a large

387 number of samples points to a possible overestimation of *hrp2* deletion frequency by studies relying on  
388 nPCR.

389

390 In almost all transmission settings, polyclonal *P. falciparum* infections are frequent [28]. Using a gel-based  
391 assay for deletion typing, in a mixed infection with a wild type parasite and a parasite carrying a deletion,  
392 the wild type parasite will produce a band and mask the deletion. These infections can be detected by  
393 RDT, but depending on the proportion of polyclonal infections, they can result in pronounced  
394 underestimation of the true frequency of deletion [29]. The highly accurate quantification by ddPCR allows  
395 detection of mixed infections. Based on experimental mixtures of 3D7 and Dd2, and field samples, mixed  
396 infections were reliably detected when at least 40% of parasites carried the deletion, and at densities  
397 above 100 genomes per reaction. Using a well-working qPCR assay with an amplification efficacy of 100%,  
398 a similar difference between *hrp2* and *tRNA* copy numbers would result in less than half a cycle difference.  
399 This is within the normal variation of technical replicates [31, 41], and thus such mixed infections could  
400 not be detected by qPCR.

401  
402 Twenty-nine isolates from Zanzibar and 16 from Ghana had tested negative by HRP2-based RDT despite  
403 high density of 100 to >10,000 parasites/ $\mu$ L [2], yet no *hrp2* deletions were observed in these populations.  
404 False-negative RDT results might be caused due to incorrect handling, prozone effect [42], or sequence  
405 variation without deletion of the *hrp2* gene [43]. The finding corroborates the importance of molecular  
406 typing. Studies comparing microscopy and RDT results can give important clues for the presence of  
407 deletions [44], but molecular typing is required for confirmation [18].

408  
409 No *hrp2* deletions were found in Zanzibar, and Kenya, and one mixed infection in Ghana. The data from  
410 Ghana contrasts an earlier study that reported a frequency of deletion of >30% [15]. A single *hrp2* deletion

411 was found in southwestern Ethiopia. This is in stark contrast to very high levels of deletion in western  
412 Ethiopia [45], Eritrea [18], and Sudan [46]. The results corroborate the need for studies assessing *hrp2*  
413 deletion and selection of diagnostic tools at sub-national level.

414

415 Contrasting findings were obtained from the sample sets from South America, with very high levels of  
416 deletion in Brazil, and no deletions in Ecuador. Brazil and Ecuador share no borders, and the amount of  
417 human migration is limited. The results add to the heterogenous pattern of *hrp2/hrp3* deletion in South  
418 America, with high frequency of *hrp2* deletion in the Amazon [9, 12, 39], but low levels among the Pacific  
419 coast [11, 12]. An outbreak of parasites with *hrp2* deletion at the Peruvian Pacific coast was caused by  
420 infections imported from the Amazon [47]. Brazil is committed to *P. falciparum* elimination, and the  
421 samples typed originated from the main hotspot of transmission [48]. Rapid diagnostic tests (RDTs) remain  
422 relatively little used in Brazil. Microscopy remains the diagnostic method of choice, and RDTs are mostly  
423 used in remote areas, e.g., populations from Amerindian Reserves and some traditional riverine  
424 communities with no access to conventional microscopy. The frequency of *hrp2* deletion in Brazil clearly  
425 exceeds the 5% threshold, thus it is recommended that no HRP2-based RDTs are used.

426

427 To determine whether the frequency of the deletion exceeds the threshold of 5%, the WHO recommends  
428 that for each site a minimum of 370 is typed [49]. Limitations of the molecular assays available for typing  
429 have been a major hindrance to type that number of samples in many sites where *hrp2* or *hrp3* deletion  
430 is suspected. Even a low proportion of false-negative results could impact the decision to discontinue  
431 HRP2-based RDTs. As a result of the scarcity of field data, the spatiotemporal dynamics of *hrp2* deletion  
432 in parasite populations, drivers of the deletion, potential fitness costs, and clinical consequences remain  
433 poorly understood. Results from simulation studies suggest that the use of *hrp2*-based RDTs selects for

434 *hrp2*-negative parasites, in particular if transmission levels are low and a large proportion of all infections  
435 turn clinical and result in treatment seeking [50, 51].

436

437 In conclusion, the novel, high-throughput, highly sensitive and specific ddPCR assay will facilitate  
438 molecular surveillance for *hrp2* and *hrp3* deletion, and thus aid selection of diagnostic tests to accelerate  
439 malaria control and elimination. Data obtained using this assay will help to understand the evolutionary  
440 processes underlying the de-novo emergence and spread of the deletion.

441

442

#### 443 **Acknowledgements**

444 We thank all study participants providing blood samples and the study teams and health center personnel  
445 who supported sample collection. We thank Michael T. Ferdig and Katelyn M. Vendrely for providing  
446 culture strain DNA for the 3D7/Dd2 experimental mixtures.

447

448

#### 449 **Supplementary Files**

450 Supplementary File S1: Assay conditions

451 Supplementary File S2: Supplementary Figures S1, S2

452 Supplementary File S3: Database

453

454

#### 455 **Financial Disclosure Statement**



456 This work was supported by NIH grants R21AI137891 awarded to CK, and U19 AI129326, D43 TW001505  
457 awarded to GY (<https://www.nih.gov>). The funders had no role in study design, data collection and  
458 analysis, decision to publish, or preparation of the manuscript.

459

460

461 **Competing interests**

462 The authors state that no competing interests exist.

463

464 **References**

465

466 1. World Health Organisation. World Malaria Report 2020. 2020.

467 2. Stuck L, Fakhri BS, Al-Mafazy AH, Hofmann NE, Holzschuh A, Grossenbacher B, et al.

468 Malaria infection prevalence and sensitivity of reactive case detection in Zanzibar. *Int J Infect*

469 *Dis.* 2020;97:337-46. Epub 2020/06/14. doi: 10.1016/j.ijid.2020.06.017. PubMed PMID:

470 32534138.

471 3. WHO. World Malaria Report 2017. 2017.

472 4. Li B, Sun Z, Li X, Li X, Wang H, Chen W, et al. Performance of pfHRP2 versus pLDH

473 antigen rapid diagnostic tests for the detection of *Plasmodium falciparum*: a systematic review

474 and meta-analysis. *Arch Med Sci.* 2017;13(3):541-9. Epub 2017/05/17. doi:

475 10.5114/aoms.2017.67279. PubMed PMID: 28507567; PubMed Central PMCID:

476 PMC5420633.

477 5. Acquah FK, Donu D, Obboh EK, Bredu D, Mawuli B, Amponsah JA, et al. Diagnostic

478 performance of an ultrasensitive HRP2-based malaria rapid diagnostic test kit used in surveys of

479 afebrile people living in Southern Ghana. *Malaria J.* 2021;20(1). doi: ARTN 125

480 10.1186/s12936-021-03665-7. PubMed PMID: WOS:000625426400002.

481 6. Hofmann NE, Antunes Moniz C, Holzschuh A, Keitel K, Boillat-Blanco N, Kagoro F, et al.

482 Diagnostic Performance of Conventional and Ultrasensitive Rapid Diagnostic Tests for Malaria in

483 Febrile Outpatients in Tanzania. *J Infect Dis.* 2019;219(9):1490-8. Epub 2018/11/27. doi:

484 10.1093/infdis/jiy676. PubMed PMID: 30476111; PubMed Central PMCID: PMC6467194.

- 485 7. World Health Organisation. False-negative RDT results and implications of new reports  
486 of *P. falciparum* histidine-rich protein 2/3 gene deletions. 2016.
- 487 8. World Health Organisation. Malaria Rapid Diagnostic Test Performance. Results of WHO  
488 product testing of malaria RDTs: round 8 (2016–2018)2018.
- 489 9. Gamboa D, Ho MF, Bendezu J, Torres K, Chiodini PL, Barnwell JW, et al. A large  
490 proportion of *P. falciparum* isolates in the Amazon region of Peru lack *pfhrp2* and *pfhrp3*:  
491 implications for malaria rapid diagnostic tests. *PLoS One*. 2010;5(1):e8091. Epub 2010/01/30.  
492 doi: 10.1371/journal.pone.0008091. PubMed PMID: 20111602; PubMed Central PMCID:  
493 PMCPMC2810332.
- 494 10. Maltha J, Gamboa D, Bendezu J, Sanchez L, Cnops L, Gillet P, et al. Rapid diagnostic tests  
495 for malaria diagnosis in the Peruvian Amazon: impact of *pfhrp2* gene deletions and cross-  
496 reactions. *PLoS One*. 2012;7(8):e43094. doi: 10.1371/journal.pone.0043094. PubMed PMID:  
497 22952633; PubMed Central PMCID: PMCPMC3429466.
- 498 11. Saenz FE, Morton LC, Okoth SA, Valenzuela G, Vera-Arias CA, Velez-Alvarez E, et al.  
499 Clonal population expansion in an outbreak of *Plasmodium falciparum* on the northwest coast  
500 of Ecuador. *Malar J*. 2015;13 Suppl 1:497. Epub 2015/12/15. doi: 10.1186/s12936-015-1019-2.  
501 PubMed PMID: 26651993; PubMed Central PMCID: PMCPMC4676133.
- 502 12. Murillo Solano C, Akinyi Okoth S, Abdallah JF, Pava Z, Dorado E, Incardona S, et al.  
503 Deletion of *Plasmodium falciparum* Histidine-Rich Protein 2 (*pfhrp2*) and Histidine-Rich Protein  
504 3 (*pfhrp3*) Genes in Colombian Parasites. *PLoS One*. 2015;10(7):e0131576. Epub 2015/07/08.  
505 doi: 10.1371/journal.pone.0131576. PubMed PMID: 26151448; PubMed Central PMCID:  
506 PMCPMC4494814.

- 507 13. Dorado EJ, Okoth SA, Montenegro LM, Diaz G, Barnwell JW, Udhayakumar V, et al.  
508 Genetic Characterisation of Plasmodium falciparum Isolates with Deletion of the pfhrp2 and/or  
509 pfhrp3 Genes in Colombia: The Amazon Region, a Challenge for Malaria Diagnosis and Control.  
510 PLoS One. 2016;11(9):e0163137. doi: 10.1371/journal.pone.0163137. PubMed PMID:  
511 27636709; PubMed Central PMCID: PMC5026348.
- 512 14. Akinyi Okoth S, Abdallah JF, Ceron N, Adhin MR, Chandrabose J, Krishnalall K, et al.  
513 Variation in Plasmodium falciparum Histidine-Rich Protein 2 (Pfhrp2) and Plasmodium  
514 falciparum Histidine-Rich Protein 3 (Pfhrp3) Gene Deletions in Guyana and Suriname. PLoS One.  
515 2015;10(5):e0126805. doi: 10.1371/journal.pone.0126805. PubMed PMID: 25978499; PubMed  
516 Central PMCID: PMC4433255.
- 517 15. Amoah LE, Abankwa J, Oppong A. Plasmodium falciparum histidine rich protein-2  
518 diversity and the implications for PfHRP 2: based malaria rapid diagnostic tests in Ghana. Malar  
519 J. 2016;15:101. Epub 2016/02/20. doi: 10.1186/s12936-016-1159-z. PubMed PMID: 26891848;  
520 PubMed Central PMCID: PMC4759916.
- 521 16. Koita OA, Doumbo OK, Ouattara A, Tall LK, Konare A, Diakite M, et al. False-negative  
522 rapid diagnostic tests for malaria and deletion of the histidine-rich repeat region of the hrp2  
523 gene. Am J Trop Med Hyg. 2012;86(2):194-8. Epub 2012/02/04. doi: 10.4269/ajtmh.2012.10-  
524 0665. PubMed PMID: 22302847; PubMed Central PMCID: PMC3269266.
- 525 17. Parr JB, Verity R, Doctor SM, Janko M, Carey-Ewend K, Turman BJ, et al. Pfhrp2-Deleted  
526 Plasmodium falciparum Parasites in the Democratic Republic of the Congo: A National Cross-  
527 sectional Survey. J Infect Dis. 2016. doi: 10.1093/infdis/jiw538. PubMed PMID: 28177502.

- 528 18. Berhane A, Anderson K, Mihreteab S, Gresty K, Rogier E, Mohamed S, et al. Major Threat  
529 to Malaria Control Programs by Plasmodium falciparum Lacking Histidine-Rich Protein 2,  
530 Eritrea. Emerg Infect Dis. 2018;24(3):462-70. Epub 2018/02/21. doi: 10.3201/eid2403.171723.  
531 PubMed PMID: 29460730; PubMed Central PMCID: PMC5823352.
- 532 19. Menegon M, L'Episcopia M, Nurahmed AM, Talha AA, Nour BYM, Severini C.  
533 Identification of Plasmodium falciparum isolates lacking histidine-rich protein 2 and 3 in Eritrea.  
534 Infect Genet Evol. 2017;55:131-4. Epub 2017/09/12. doi: 10.1016/j.meegid.2017.09.004.  
535 PubMed PMID: 28889944.
- 536 20. Bharti PK, Chandel HS, Ahmad A, Krishna S, Udhayakumar V, Singh N. Prevalence of  
537 pfhpr2 and/or pfhpr3 Gene Deletion in Plasmodium falciparum Population in Eight Highly  
538 Endemic States in India. PLoS One. 2016;11(8):e0157949. doi: 10.1371/journal.pone.0157949.  
539 PubMed PMID: 27518538; PubMed Central PMCID: PMC4982695.
- 540 21. Li P, Xing H, Zhao Z, Yang Z, Cao Y, Li W, et al. Genetic diversity of Plasmodium  
541 falciparum histidine-rich protein 2 in the China-Myanmar border area. Acta Trop. 2015;152:26-  
542 31. doi: 10.1016/j.actatropica.2015.08.003. PubMed PMID: 26297799; PubMed Central PMCID:  
543 PMC4918506.
- 544 22. Kumar N, Pande V, Bhatt RM, Shah NK, Mishra N, Srivastava B, et al. Genetic deletion of  
545 HRP2 and HRP3 in Indian Plasmodium falciparum population and false negative malaria rapid  
546 diagnostic test. Acta Trop. 2013;125(1):119-21. doi: 10.1016/j.actatropica.2012.09.015.  
547 PubMed PMID: 23041541.
- 548 23. Nima MK, Hougard T, Hossain ME, Kibria MG, Mohon AN, Johora FT, et al. Case Report:  
549 A Case of Plasmodium falciparum hrp2 and hrp3 Gene Mutation in Bangladesh. American

- 550 Journal of Tropical Medicine and Hygiene. 2017;97(4):1155-8. doi: 10.4269/ajtmh.16-0884.  
551 PubMed PMID: WOS:000423208300030.
- 552 24. Pati P, Dhangadamajhi G, Bal M, Ranjit M. High proportions of pfhrp2 gene deletion and  
553 performance of HRP2-based rapid diagnostic test in Plasmodium falciparum field isolates of  
554 Odisha. Malar J. 2018;17(1):394. Epub 2018/10/31. doi: 10.1186/s12936-018-2502-3. PubMed  
555 PMID: 30373573; PubMed Central PMCID: PMC6206925.
- 556 25. Kong A, Wilson SA, Ah Y, Nace D, Rogier E, Aidoo M. HRP2 and HRP3 cross-reactivity and  
557 implications for HRP2-based RDT use in regions with Plasmodium falciparum hrp2 gene  
558 deletions. Malaria J. 2021;20(1). doi: ARTN 207  
559 10.1186/s12936-021-03739-6. PubMed PMID: WOS:000651405700003.
- 560 26. Cheng Q, Gatton ML, Barnwell J, Chiodini P, McCarthy J, Bell D, et al. Plasmodium  
561 falciparum parasites lacking histidine-rich protein 2 and 3: a review and recommendations for  
562 accurate reporting. Malar J. 2014;13:283. Epub 2014/07/24. doi: 10.1186/1475-2875-13-283.  
563 PubMed PMID: 25052298; PubMed Central PMCID: PMC4115471.
- 564 27. World Health Organisation. P. falciparum hrp2/3 gene deletions. Conclusions and  
565 recommendations of a Technical Consultation. 2016.
- 566 28. Lopez L, Koepfli C. Systematic review of Plasmodium falciparum and Plasmodium vivax  
567 polyclonal infections: Impact of prevalence, study population characteristics, and laboratory  
568 procedures. 2021. doi: 10.1101/2021.03.18.436023.
- 569 29. Watson OJ, Verity R, Ghani AC, Garske T, Cunningham J, Tshetu A, et al. Impact of  
570 seasonal variations in Plasmodium falciparum malaria transmission on the surveillance of

- 571 pfhpr2 gene deletions. *Elife*. 2019;8. Epub 2019/05/03. doi: 10.7554/eLife.40339. PubMed  
572 PMID: 31045490; PubMed Central PMCID: PMC6533063.
- 573 30. Schindler T, Deal AC, Fink M, Guirou E, Moser KA, Mwakasungula SM, et al. A multiplex  
574 qPCR approach for detection of pfhpr2 and pfhpr3 gene deletions in multiple strain infections  
575 of *Plasmodium falciparum*. *Sci Rep-Uk*. 2019;9. doi: ARTN 13107  
576 10.1038/s41598-019-49389-2. PubMed PMID: WOS:000485215700016.
- 577 31. Koepfli C, Nguitragool W, Hofmann NE, Robinson LJ, Ome-Kaius M, Sattabongkot J, et al.  
578 Sensitive and accurate quantification of human malaria parasites using droplet digital PCR  
579 (ddPCR). *Sci Rep*. 2016;6:39183. Epub 2016/12/17. doi: 10.1038/srep39183. PubMed PMID:  
580 27982132; PubMed Central PMCID: PMC5159915.
- 581 32. Friedrich O, Reiling SJ, Wunderlich J, Rohrbach P. Assessment of *Plasmodium falciparum*  
582 PfMDR1 transport rates using Fluo-4. *J Cell Mol Med*. 2014;18(9):1851-62. Epub 2014/06/04.  
583 doi: 10.1111/jcmm.12313. PubMed PMID: 24889967; PubMed Central PMCID:  
584 PMC4196660.
- 585 33. Akinyi S, Hayden T, Gamboa D, Torres K, Bendezu J, Abdallah JF, et al. Multiple genetic  
586 origins of histidine-rich protein 2 gene deletion in *Plasmodium falciparum* parasites from Peru.  
587 *Sci Rep*. 2013;3:2797. Epub 2013/10/01. doi: 10.1038/srep02797. PubMed PMID: 24077522;  
588 PubMed Central PMCID: PMC3786299.
- 589 34. Abdallah JF, Okoth SA, Fontecha GA, Torres RE, Banegas EI, Matute ML, et al. Prevalence  
590 of pfhpr2 and pfhpr3 gene deletions in Puerto Lempira, Honduras. *Malar J*. 2015;14:19. Epub  
591 2015/01/22. doi: 10.1186/s12936-014-0537-7. PubMed PMID: 25604310; PubMed Central  
592 PMCID: PMC4308922.

- 593 35. Oduma CO, Ogolla S, Atieli H, Ondigo BN, Lee MC, Githeko AK, et al. Increased  
594 investment in gametocytes in asymptomatic Plasmodium falciparum infections in the wet  
595 season. BMC Infect Dis. 2021;21(1):44. Epub 2021/01/11. doi: 10.1186/s12879-020-05761-6.  
596 PubMed PMID: 33422001; PubMed Central PMCID: PMC7797145.
- 597 36. Zemene E, Koepfli C, Tiruneh A, Yeshiwondim AK, Seyoum D, Lee MC, et al. Detection of  
598 foci of residual malaria transmission through reactive case detection in Ethiopia. Malar J.  
599 2018;17(1):390. Epub 2018/10/28. doi: 10.1186/s12936-018-2537-5. PubMed PMID: 30367636;  
600 PubMed Central PMCID: PMC6203988.
- 601 37. Dieng CC, Gonzalez L, Pestana K, Dhikrullahi SB, Amoah LE, Afrane YA, et al. Contrasting  
602 Asymptomatic and Drug Resistance Gene Prevalence of Plasmodium falciparum in Ghana:  
603 Implications on Seasonal Malaria Chemoprevention. Genes (Basel). 2019;10(7). Epub  
604 2019/07/19. doi: 10.3390/genes10070538. PubMed PMID: 31315304; PubMed Central PMCID:  
605 PMC6678124.
- 606 38. Ladeia-Andrade S, de Melo GNP, de Souza-Lima RD, Salla LC, Bastos MS, Rodrigues PT, et  
607 al. No Clinical or Molecular Evidence of Plasmodium falciparum Resistance to Artesunate  
608 Mefloquine in Northwestern Brazil. American Journal of Tropical Medicine and Hygiene.  
609 2016;95(1):148-54. doi: 10.4269/ajtmh.16-0017. PubMed PMID: WOS:000400206100029.
- 610 39. Goes L, Chamma-Siqueira N, Peres JM, Nascimento JM, Valle S, Arcanjo AR, et al.  
611 Evaluation of Histidine-Rich Proteins 2 and 3 Gene Deletions in Plasmodium falciparum in  
612 Endemic Areas of the Brazilian Amazon. Int J Environ Res Public Health. 2020;18(1). Epub  
613 2020/12/31. doi: 10.3390/ijerph18010123. PubMed PMID: 33375379; PubMed Central PMCID:  
614 PMC7795390.



- 615 40. Beshir KB, Sepulveda N, Bharmal J, Robinson A, Mwanguzi J, Busula AO, et al.  
616 Plasmodium falciparum parasites with histidine-rich protein 2 (pfhrp2) and pfhrp3 gene  
617 deletions in two endemic regions of Kenya. Sci Rep. 2017;7(1):14718. Epub 2017/11/09. doi:  
618 10.1038/s41598-017-15031-2. PubMed PMID: 29116127; PubMed Central PMCID:  
619 PMCPMC5677122.
- 620 41. Hindson CM, Chevillet JR, Briggs HA, Gallichotte EN, Ruf IK, Hindson BJ, et al. Absolute  
621 quantification by droplet digital PCR versus analog real-time PCR. Nat Methods.  
622 2013;10(10):1003-5. Epub 2013/09/03. doi: 10.1038/nmeth.2633. PubMed PMID: 23995387;  
623 PubMed Central PMCID: PMCPMC4118677.
- 624 42. Gillet P, Mori M, Van Esbroeck M, Van den Ende J, Jacobs J. Assessment of the prozone  
625 effect in malaria rapid diagnostic tests. Malar J. 2009;8:271. Epub 2009/12/02. doi:  
626 10.1186/1475-2875-8-271. PubMed PMID: 19948018; PubMed Central PMCID:  
627 PMCPMC2789093.
- 628 43. Nderu D, Kimani F, Thiong'o K, Karanja E, Akinyi M, Too E, et al. Plasmodium falciparum  
629 histidine-rich protein (PfHRP2 and 3) diversity in Western and Coastal Kenya. Sci Rep.  
630 2019;9(1):1709. Epub 2019/02/10. doi: 10.1038/s41598-018-38175-1. PubMed PMID:  
631 30737461; PubMed Central PMCID: PMCPMC6368535.
- 632 44. Berhane A, Russom M, Bahta I, Hagos F, Ghirmai M, Uqubay S. Rapid diagnostic tests  
633 failing to detect Plasmodium falciparum infections in Eritrea: an investigation of reported false  
634 negative RDT results. Malar J. 2017;16(1):105. Epub 2017/03/08. doi: 10.1186/s12936-017-  
635 1752-9. PubMed PMID: 28264689; PubMed Central PMCID: PMCPMC5339986.

- 636 45. Alemayehu GS, Blackburn K, Lopez K, Cambel Dieng C, Lo E, Janies D, et al. Detection of  
637 high prevalence of Plasmodium falciparum histidine-rich protein 2/3 gene deletions in Assosa  
638 zone, Ethiopia: implication for malaria diagnosis. *Malar J.* 2021;20(1):109. Epub 2021/02/25.  
639 doi: 10.1186/s12936-021-03629-x. PubMed PMID: 33622309.
- 640 46. Prosser C, Gresty K, Ellis J, Meyer W, Anderson K, Lee R, et al. Plasmodium falciparum  
641 Histidine-Rich Protein 2 and 3 Gene Deletions in Strains from Nigeria, Sudan, and South Sudan.  
642 *Emerg Infect Dis.* 2021;27(2):471-9. Epub 2021/01/27. doi: 10.3201/eid2702.191410. PubMed  
643 PMID: 33496220; PubMed Central PMCID: PMC7853540.
- 644 47. Baldeviano GC, Okoth SA, Arrospe N, Gonzalez RV, Sanchez JF, Macedo S, et al.  
645 Molecular Epidemiology of Plasmodium falciparum Malaria Outbreak, Tumbes, Peru, 2010-  
646 2012. *Emerg Infect Dis.* 2015;21(5):797-803. Epub 2015/04/22. doi: 10.3201/eid2105.141427.  
647 PubMed PMID: 25897626; PubMed Central PMCID: PMC4412223.
- 648 48. Ferreira MU, Castro MC. Challenges for malaria elimination in Brazil. *Malar J.*  
649 2016;15(1):284. Epub 2016/05/22. doi: 10.1186/s12936-016-1335-1. PubMed PMID: 27206924;  
650 PubMed Central PMCID: PMC4875681.
- 651 49. World Health Organization. Surveillance template protocol for pfhrp2/pfhrp3 gene  
652 deletions. 2020.
- 653 50. Gatton ML, Dunn J, Chaudhry A, Ciketic S, Cunningham J, Cheng Q. Implications of  
654 Parasites Lacking Plasmodium falciparum Histidine-Rich Protein 2 on Malaria Morbidity and  
655 Control When Rapid Diagnostic Tests Are Used for Diagnosis. *J Infect Dis.* 2017;215(7):1156-66.  
656 Epub 2017/03/23. doi: 10.1093/infdis/jix094. PubMed PMID: 28329034.

657 51. Watson OJ, Slater HC, Verity R, Parr JB, Mwandagalirwa MK, Tshefu A, et al. Modelling  
658 the drivers of the spread of Plasmodium falciparum hrp2 gene deletions in sub-Saharan Africa.  
659 Elife. 2017;6. Epub 2017/08/25. doi: 10.7554/eLife.25008. PubMed PMID: 28837020; PubMed  
660 Central PMCID: PMC5602420.  
661
