# Supplementary material for: Plasmodium falciparum hrp2 and hrp3 gene deletion status in Africa and South America by highly sensitive and specific digital PCR
Source: bioRxiv or medRxiv preprint supplement (doi:10.1101/2021.06.01.21258117), 2021-06-04
Supplement: Supplementary file [file media-2.pdf]

# ***Plasmodium falciparum* hrp2 and hrp3 gene deletion status in Africa and South America by highly sensitive and specific digital PCR**

Claudia A. Vera-Arias *et al.*

## **Supplementary File S1**

### **ddPCR assays**

Supermix from BioRad  
All primers at 10  $\mu$ M

#### ***hrp2* exon 2 ddPCR**

|                               | [ $\mu$ L] | Cycling conditions               |
|-------------------------------|------------|----------------------------------|
| SuperMix for Probes (no dUTP) | 11         |                                  |
| hrp2_Exon 2_fwd               | 1.76       | 95° 10 min                       |
| hrp2_Exon 2_rev               | 1.76       | 94° 30 sec                       |
| hrp2_Exon 2_Probe             | 0.88       | 56° 1 min => 44 x back to step 2 |
| tRNA_fwd                      | 0.44       | 98° 10 min                       |
| tRNA_rev                      | 0.44       | 4° hold                          |
| tRNA_Probe                    | 0.22       |                                  |
| H2O                           | 3.5        |                                  |
| DNA                           | 2          |                                  |

#### ***hrp2* exon 1 ddPCR**

|                               | [ $\mu$ L] | Cycling conditions               |
|-------------------------------|------------|----------------------------------|
| SuperMix for Probes (no dUTP) | 11         |                                  |
| hrp2-exon1_fwd                | 1.76       | 95° 10 min                       |
| hrp2-exon1_rev                | 1.76       | 94° 30 sec                       |
| hrp2-exon1_Probe              | 0.88       | 54° 1 min => 44 x back to step 2 |
| tRNA_fwd                      | 0.44       | 98° 10 min                       |
| tRNA_rev                      | 0.44       | 4° hold                          |
| tRNA_Probe                    | 0.22       |                                  |
| H2O                           |            |                                  |
| DNA                           | 2          |                                  |

#### ***hrp3* ddPCR**

|                               | [ $\mu$ L] | Cycling conditions               |
|-------------------------------|------------|----------------------------------|
| SuperMix for Probes (no dUTP) | 11         |                                  |
| hrp3_fwd                      | 0.66       | 95° 10 min                       |
| hrp3_rev                      | 0.66       | 94° 30 sec                       |
| hrp3_Probe                    | 0.44       | 55° 1 min => 44 x back to step 2 |
| tRNA_fwd                      | 0.44       | 4° hold                          |
| tRNA_rev                      | 0.44       |                                  |
| tRNA_Probe                    | 0.22       |                                  |
| H2O                           | 3.24       |                                  |
| DNA                           | 6          |                                  |

## Nested PCR assays

### *hrp2* nested PCR

Polymerase, buffer, and dNTPs from Solis Biodyne  
All primers at 10  $\mu$ M

| Primary PCR           | [ $\mu$ L] | Cycling conditions               |
|-----------------------|------------|----------------------------------|
| Taq FirePol           | 0.15       |                                  |
| Buffer B              | 1.5        | 94° 10 min                       |
| MgCl <sub>2</sub>     | 1.5        | 94° 50 sec                       |
| dNTPs                 | 1.3        | 55° 50 sec => 39x back to step 2 |
| Primer <i>hrp2_F1</i> | 0.2        | 70° 1 min                        |
| Primer <i>hrp2_R1</i> | 0.2        | 70° 5 min                        |
| H <sub>2</sub> O      | 8.25       |                                  |
| DNA                   | 2          |                                  |

| Nested PCR            | [ $\mu$ L] | Cycling conditions               |
|-----------------------|------------|----------------------------------|
| Taq FirePol           | 0.15       |                                  |
| Buffer B              | 1.5        | 94° 10 min                       |
| MgCl <sub>2</sub>     | 1.5        | 94° 50 sec                       |
| dNTPs                 | 1.3        | 55° 50 sec => 39x back to step 2 |
| Primer <i>hrp2_F2</i> | 0.2        | 70° 1 min                        |
| Primer <i>hrp2_R1</i> | 0.2        | 70° 5 min                        |
| H <sub>2</sub> O      | 8.25       |                                  |
| DNA                   | 2          |                                  |

### Primer sequences

*Hrp2* F1            5'-CAAAAGGACTTAATTTAAATAAGAG-3'  
*Hrp2* R1            5'-AATAAATTTAATGGCGTAGGCA-3'  
*Hrp2* F2            5'-ATTATTACAGAACTCAAGCAC-3'

### *msp2* nested PCR

Polymerase, buffer, and dNTPs from Solis Biodyne  
All primers at 10  $\mu$ M

| Primary PCR               | [ $\mu$ L] | Cycling conditions               |
|---------------------------|------------|----------------------------------|
| ddH <sub>2</sub> O        | 7.85       |                                  |
| Buffer B                  | 1.5        | 95° 1 min                        |
| MgCl <sub>2</sub> 25 mM   | 1.5        | 95° 30 sec                       |
| dNTPs 2.5 mM              | 1.2        | 55° 30 sec                       |
| Primer <i>msp2_S2-fw</i>  | 0.4        | 72° 1 min => 34 x back to step 2 |
| Primer <i>msp2_S3-rev</i> | 0.4        | 72° 5 min                        |
| Taq FirePol               | 0.15       |                                  |
| DNA                       | 2          |                                  |

| Nested PCR                  | [ $\mu$ L] | Cycling conditions               |
|-----------------------------|------------|----------------------------------|
| ddH <sub>2</sub> O          | 8.975      |                                  |
| Buffer B                    | 1.5        | 95° 1 min                        |
| MgCl <sub>2</sub> 25 mM     | 1.5        | 95° 30 sec                       |
| dNTPs 2.5 mM                | 1.2        | 55° 30 sec                       |
| Primer M5_Fc27 (10 $\mu$ M) | 0.15       | 72° 1 min => 34 x back to step 2 |
| Primer N5_3D7 (10 $\mu$ M)  | 0.225      | 72° 5 min                        |

|                         |      |
|-------------------------|------|
| Primer S1-tail fw       | 0.3  |
| Taq FirePol             | 0.15 |
| Primary PCR as template | 1    |

#### Primer sequences

|                                |                                    |
|--------------------------------|------------------------------------|
| <i>msp2_S2</i> -fw:            | 5' - GAAGGTAATTAAAACATTGTC-3'      |
| <i>msp2_S3</i> -rev:           | 5' - GAGGGATGTTGCTGCTCCACAG -3'    |
| <i>msp2_S1Tail</i> -fw :       | 5' - GCTTATAATATGAGTATAAGGAGAA -3' |
| <i>msp2_FC27 type_M5</i> -rev: | 5' - GCATTGCCAGAACTTGAA -3'        |
| <i>msp2_3D7 type_N5</i> -rev:  | 5' - VIC-CTGAAGAGGTACTGGTAGA -3'   |
